# Supplementary material for: Potassium–carbonate co-substituted hydroxyapatite compositions: maximising the level of carbonate uptake for potential CO2 utilisation options
Source: Royal Society of Chemistry journal article supplement (doi:10.1039/d1ma00676b), 2022-01-01
Supplement: d1ma00676b1.pdf [file d1ma00676b1.pdf]

## Supplementary Material

Table S1 The quantities (in moles) of the reactants used to prepare the apatites studied in this work, where  $K_2CO_3$  was used to provide the necessary potassium ions. The value of x refers to the designed molar substitution of potassium and carbonate ions on calcium and phosphate sites respectively in accordance with the design composition formula  $Ca_{10-x}K_x(PO_4)_{6-x}(CO_3)_x(OH)_2$ .

| Design x | $Ca(OH)_2$<br>(moles) | $K_2CO_3$<br>(moles) | $H_3PO_4$<br>(moles) | Design<br>Ca/P | Design<br>(Ca+K)/P |
|----------|-----------------------|----------------------|----------------------|----------------|--------------------|
| 0        | 0.1100                | N/A                  | 0.0660               | 1.67           | N/A                |
| 0.5      | 0.1045                | 0.00275              | 0.0605               | 1.73           | 1.82               |
| 1.0      | 0.0990                | 0.00550              | 0.0550               | 1.80           | 2.00               |
| 1.5      | 0.0935                | 0.00825              | 0.0495               | 1.89           | 2.22               |
| 2.0      | 0.0880                | 0.0110               | 0.0440               | 2.00           | 2.50               |
| 2.5      | 0.0825                | 0.01375              | 0.0385               | 2.14           | 2.86               |
| 3.0      | 0.0770                | 0.01650              | 0.0330               | 2.33           | 3.33               |

Table S2 The quantities (in moles) of the reactants used to prepare the apatites studied in this work, where  $KHCO_3$  was used to provide the necessary potassium ions. The value of x refers to the designed molar substitution of potassium and carbonate ions on calcium and phosphate sites respectively in accordance with the design composition formula  $Ca_{10-x}K_x(PO_4)_{6-x}(CO_3)_x(OH)_2$ .

| Design x | $Ca(OH)_2$<br>(moles) | $KHCO_3$<br>(moles) | $H_3PO_4$<br>(moles) | Design<br>Ca/P | Design<br>(Ca+K)/P |
|----------|-----------------------|---------------------|----------------------|----------------|--------------------|
| 0        | 0.1100                | N/A                 | 0.0660               | 1.67           | N/A                |
| 0.5      | 0.1045                | 0.0055              | 0.0605               | 1.73           | 1.82               |
| 1.0      | 0.0990                | 0.0110              | 0.0550               | 1.80           | 2.00               |
| 1.5      | 0.0935                | 0.0165              | 0.0495               | 1.89           | 2.22               |
| 2.0      | 0.0880                | 0.0220              | 0.0440               | 2.00           | 2.50               |
| 2.5      | 0.0825                | 0.0275              | 0.0385               | 2.14           | 2.86               |
| 3.0      | 0.0770                | 0.0330              | 0.0330               | 2.33           | 3.33               |

Table S3 Average crystallite sizes (in nm), calculated using Scherrer's equation and the (002) reflection at approximately 25.8 °2θ, of Series I and Series II of as-prepared apatite materials where x = 0-2.5 in the design formula  $\text{Ca}_{10-x}\text{K}_x(\text{PO}_4)_{6-x}(\text{CO}_3)_x(\text{OH})_2$ .

| Design x | Series I $\text{K}_2\text{CO}_3$ (nm) | Series II $\text{KHCO}_3$ (nm) |
|----------|---------------------------------------|--------------------------------|
| 0        | 29 ± 1                                | 29 ± 1                         |
| 0.5      | 27 ± 3                                | 24 ± 2                         |
| 1.0      | 26 ± 2                                | 22 ± 2                         |
| 1.5      | 22 ± 1                                | 21 ± 1                         |
| 2.0      | 22 ± 1                                | N/A                            |
| 2.5      | 18 ± 2                                | N/A                            |

Table S4 The lattice parameters and unit cell volume of the as-prepared K- $\text{CO}_3$  co-substituted apatites of each series, where x = 0-2.5 in the design formula  $\text{Ca}_{10-x}\text{K}_x(\text{PO}_4)_{6-x}(\text{CO}_3)_x(\text{OH})_2$ . Compositions of x = 2.0 and 2.5 in Series II contained an impurity phase so lattice parameters were not determined (N/A). Respective e.s.d values are presented in brackets.

| Design x | Series I ( $\text{K}_2\text{CO}_3$ ) |           |                          | Series II ( $\text{KHCO}_3$ ) |           |                          |
|----------|--------------------------------------|-----------|--------------------------|-------------------------------|-----------|--------------------------|
|          | a (Å)                                | c (Å)     | Volume (Å <sup>3</sup> ) | a (Å)                         | c (Å)     | Volume (Å <sup>3</sup> ) |
| 0        | 9.4072(5)                            | 6.8903(5) | 528.05(1)                | 9.4072(5)                     | 6.8903(5) | 528.05(1)                |
| 0.5      | 9.3843(5)                            | 6.8883(5) | 525.33(1)                | 9.3806(5)                     | 6.8929(6) | 525.27(1)                |
| 1.0      | 9.3775(6)                            | 6.8959(6) | 525.15(1)                | 9.3685(6)                     | 6.8978(7) | 524.29(1)                |
| 1.5      | 9.3654(6)                            | 6.8992(6) | 524.05(1)                | 9.3495(6)                     | 6.8908(7) | 521.63(1)                |
| 2.0      | 9.3513(6)                            | 6.8952(7) | 522.17(1)                | N/A                           | N/A       | N/A                      |
| 2.5      | 9.3384(7)                            | 6.8929(8) | 520.55(1)                | N/A                           | N/A       | N/A                      |

Table S5 Expected and measured potassium contents, Ca/P molar ratios and (Ca+K)/P molar ratios (measured using energy dispersive X-ray spectroscopy) and carbonate contents (measured using combustion analysis) of the single-phase as-prepared apatites of Series I, where x = 0-2.5 in the design composition formula  $\text{Ca}_{10-x}\text{K}_x(\text{PO}_4)_{6-x}(\text{CO}_3)_x(\text{OH})_2$ . The expected values were calculated in accordance with this design formula.

| Design x | wt% K<br>(expected) | wt% K<br>(measured) | Ca/P<br>(expected) | Ca/P<br>(measured) | (Ca+K)/P<br>(expected) | (Ca+K)/P<br>(measured) | wt% CO <sub>3</sub><br>(expected) | wt% CO <sub>3</sub><br>(measured) |
|----------|---------------------|---------------------|--------------------|--------------------|------------------------|------------------------|-----------------------------------|-----------------------------------|
| 0        | N/A                 | N/A                 | 1.67               | 1.64 ± 0.02        | N/A                    | N/A                    | 0                                 | 2.28 ± 0.03                       |
| 0.5      | 1.98                | 0.45 ± 0.06         | 1.73               | 1.69 ± 0.02        | 1.82                   | 1.71 ± 0.02            | 3.04                              | 3.39 ± 0.00                       |
| 1.0      | 4.04                | 0.79 ± 0.10         | 1.80               | 1.77 ± 0.01        | 2.00                   | 1.81 ± 0.00            | 6.19                              | 5.40 ± 0.00                       |
| 1.5      | 6.17                | 0.91 ± 0.05         | 1.89               | 1.82 ± 0.01        | 2.22                   | 1.87 ± 0.01            | 9.47                              | 7.90 ± 0.00                       |
| 2.0      | 8.38                | 0.85 ± 0.04         | 2.00               | 1.93 ± 0.01        | 2.50                   | 1.98 ± 0.01            | 12.87                             | 9.60 ± 0.00                       |
| 2.5      | 10.69               | 0.81 ± 0.19         | 2.14               | 2.09 ± 0.00        | 2.86                   | 2.14 ± 0.01            | 16.40                             | 13.03 ± 0.04                      |

Table S6 Expected and measured potassium contents, Ca/P molar ratios and (Ca+K)/P molar ratios (measured using energy dispersive X-ray spectroscopy) and carbonate contents (measured using combustion analysis) of the single-phase as-prepared apatites of Series II, where x = 0-1.5 in the design composition formula  $\text{Ca}_{10-x}\text{K}_x(\text{PO}_4)_{6-x}(\text{CO}_3)_x(\text{OH})_2$ . The expected values were calculated in accordance with this design formula.

| Design x | wt% K<br>(expected) | wt% K<br>(measured) | Ca/P<br>(expected) | Ca/P<br>(measured) | (Ca+K)/P<br>(expected) | (Ca+K)/P<br>(measured) | wt% CO <sub>3</sub><br>(expected) | wt% CO <sub>3</sub><br>(measured) |
|----------|---------------------|---------------------|--------------------|--------------------|------------------------|------------------------|-----------------------------------|-----------------------------------|
| 0        | N/A                 | N/A                 | 1.67               | 1.64 ± 0.02        | N/A                    | N/A                    | 0                                 | 2.28 ± 0.03                       |
| 0.5      | 1.98                | 0.41 ± 0.04         | 1.73               | 1.72 ± 0.00        | 1.82                   | 1.74 ± 0.01            | 3.04                              | 5.23 ± 0.04                       |
| 1.0      | 4.04                | 0.62 ± 0.03         | 1.80               | 1.82 ± 0.01        | 2.00                   | 1.85 ± 0.01            | 6.19                              | 7.68 ± 0.04                       |
| 1.5      | 6.17                | 0.94 ± 0.02         | 1.89               | 1.90 ± 0.01        | 2.22                   | 1.95 ± 0.01            | 9.47                              | 9.58 ± 0.04                       |

Table S7 Results of EDX/combustion analysis performed on K-CO<sub>3</sub> co-substituted apatites prepared using K<sub>2</sub>CO<sub>3</sub> and with/without concentrated aqueous ammonia (NH<sub>4</sub>OH) solution added to the calcium/potassium suspension, where x = 0.5 or 2.5 in the design composition formula Ca<sub>10-x</sub>K<sub>x</sub>(PO<sub>4</sub>)<sub>6-x</sub>(CO<sub>3</sub>)<sub>x</sub>(OH)<sub>2</sub>.

| Design x   | NH <sub>4</sub> OH added? | wt% K       | Ca/P        | (Ca+K)/P    | wt% CO <sub>3</sub> |
|------------|---------------------------|-------------|-------------|-------------|---------------------|
| <b>0.5</b> | Yes                       | 0.45 ± 0.06 | 1.69 ± 0.02 | 1.71 ± 0.02 | 3.39 ± 0.00         |
|            | No                        | 0.41 ± 0.01 | 1.68 ± 0.01 | 1.70 ± 0.01 | 3.88 ± 0.01         |
| <b>2.5</b> | Yes                       | 0.81 ± 0.19 | 2.09 ± 0.00 | 2.14 ± 0.01 | 13.03 ± 0.04        |
|            | No                        | 0.38 ± 0.03 | 2.09 ± 0.01 | 2.12 ± 0.01 | 12.93 ± 0.11        |

Table S8 The deconvoluted peak positions (cm<sup>-1</sup>) and relative peak areas (%) from the FTIR spectra of the carbonate  $\nu_3$ , OH<sub>L</sub> and phosphate  $\nu_4$  regions of the as-prepared K-CO<sub>3</sub> co-substituted apatites of each series. Peaks are arbitrary numbered from 1b-6b, or 1a-5a, from high to low wavenumbers. Due to rounding peak areas to whole numbers the sum of the peak areas will not always equal 100%.

| Design x         | CO <sub>3</sub> $\nu_3$ position (cm <sup>-1</sup> ) & area (%) |            |            |            |            |            | OH <sub>L</sub> /PO <sub>4</sub> $\nu_4$ position (cm <sup>-1</sup> ) & area (%) |           |           |           |           |
|------------------|-----------------------------------------------------------------|------------|------------|------------|------------|------------|----------------------------------------------------------------------------------|-----------|-----------|-----------|-----------|
|                  | 1b                                                              | 2b         | 3b         | 4b         | 5b         | 6b         | 1a                                                                               | 2a        | 3a        | 4a        | 5a        |
| <b>0</b>         | 1565 (10%)                                                      | 1493 (16%) | 1460 (18%) | 1445 (13%) | 1417 (30%) | 1395 (12%) | 627 (16%)                                                                        | 602 (17%) | 576 (22%) | 561 (28%) | 543 (17%) |
| <b>Series I</b>  |                                                                 |            |            |            |            |            |                                                                                  |           |           |           |           |
| <b>0.5</b>       | 1557 (3%)                                                       | 1488 (30%) | 1449 (25%) | 1419 (9%)  | 1408 (28%) | 1374 (5%)  | 627 (14%)                                                                        | 601 (21%) | 580 (11%) | 563 (37%) | 543 (17%) |
| <b>1.0</b>       | 1542 (3%)                                                       | 1489 (29%) | 1448 (26%) | 1420 (7%)  | 1406 (26%) | 1381 (9%)  | 629 (11%)                                                                        | 602 (24%) | 579 (15%) | 563 (34%) | 546 (16%) |
| <b>1.5</b>       | 1526 (6%)                                                       | 1486 (29%) | 1452 (17%) | 1422 (3%)  | 1410 (39%) | 1373 (6%)  | 630 (9%)                                                                         | 603 (28%) | 581 (11%) | 564 (38%) | 545 (15%) |
| <b>2.0</b>       | 1534 (7%)                                                       | 1489 (30%) | 1456 (11%) | 1423 (1%)  | 1412 (47%) | 1355 (4%)  | 630 (8%)                                                                         | 604 (28%) | 580 (16%) | 564 (35%) | 546 (13%) |
| <b>2.5</b>       | 1523 (13%)                                                      | 1492 (19%) | 1455 (23%) | 1424 (12%) | 1401 (27%) | 1372 (7%)  | 626 (8%)                                                                         | 603 (28%) | 582 (14%) | 565 (38%) | 546 (12%) |
| <b>Series II</b> |                                                                 |            |            |            |            |            |                                                                                  |           |           |           |           |
| <b>0.5</b>       | 1548 (3%)                                                       | 1489 (29%) | 1449 (24%) | 1420 (8%)  | 1407 (23%) | 1393 (11%) | 631 (12%)                                                                        | 601 (26%) | 577 (14%) | 562 (32%) | 542 (16%) |
| <b>1.0</b>       | 1530 (6%)                                                       | 1488 (30%) | 1449 (21%) | 1421 (7%)  | 1407 (28%) | 1385 (10%) | 629 (11%)                                                                        | 603 (23%) | 579 (15%) | 563 (35%) | 544 (16%) |
| <b>1.5</b>       | 1528 (7%)                                                       | 1489 (30%) | 1447 (23%) | 1422 (4%)  | 1406 (29%) | 1377 (8%)  | 631 (8%)                                                                         | 604 (27%) | 581 (15%) | 564 (36%) | 546 (13%) |

Table S9 The lattice parameters and unit cell volume of the  $x = 2.5$  K-CO<sub>3</sub> co-substituted apatite of Series I as-prepared (AP) and after being heated in dry CO<sub>2</sub> at 300-600°C. Respective e.s.d values are shown in brackets.

| Temperature (°C) | <i>a</i> (Å) | <i>c</i> (Å) | Volume (Å <sup>3</sup> ) |
|------------------|--------------|--------------|--------------------------|
| <b>AP</b>        | 9.3384(7)    | 6.8929(8)    | 520.55(1)                |
| <b>300</b>       | 9.3393(7)    | 6.8881(7)    | 520.29(1)                |
| <b>400</b>       | 9.3704(6)    | 6.9028(7)    | 524.88(1)                |
| <b>500</b>       | 9.3955(6)    | 6.9108(7)    | 528.31(1)                |
| <b>600</b>       | 9.4361(5)    | 6.9118(5)    | 532.96(1)                |
